# Supplementary material for: Transcriptomics of two evolutionary novelties: how to make a sperm-transfer organ out of an anal fin and a sexually selected “sword” out of a caudal fin
Source: PubMed Central journal article supplement (PMC4338968; doi:10.1002/ece3.1390), 2015-01-23

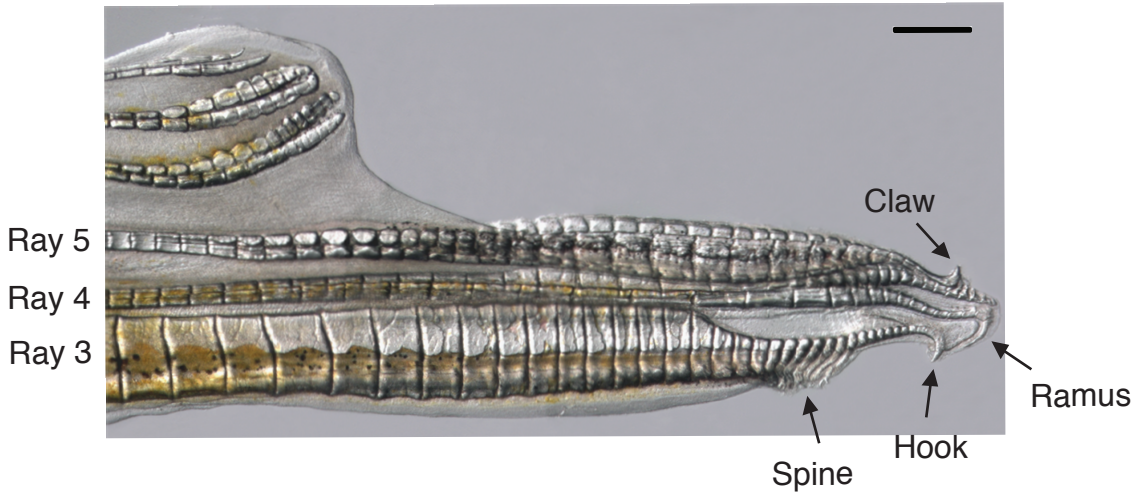

Supplement: ece30005-0848-sd3.pdf [file ece30005-0848-sd3.pdf]
